# Supplementary material for: Bifunctional Au–Sn-SiO 2 catalysts promote the direct upgrading of glycerol to methyl lactate
Source: Royal Society of Chemistry journal article supplement (doi:10.1039/d3nr06518a), 2024-01-01
Supplement: d3nr06518a1.pdf [file d3nr06518a1.pdf]

# Bifunctional Au-Sn-SiO<sub>2</sub> catalysts promote the direct upgrading of glycerol to methyl lactate

Margot Van der Verren,<sup>1</sup> Anna Corrias,<sup>2</sup> Vit Vykoukal,<sup>3</sup> Ales Styskalik,<sup>3</sup> Carmela Aprile,<sup>4</sup> Damien P. Debecker<sup>1</sup> \*

<sup>1</sup> Institute of Condensed Matter and Nanoscience (IMCN), UCLouvain, Place Louis Pasteur 1, 1348 Louvain-La-Neuve, Belgium.

<sup>2</sup> University of Kent, School of Chemistry and Forensic Science, Ingram Building, Canterbury, CT2 7NH, UK

<sup>3</sup> Masaryk University, Department of Chemistry, Kotlarska 2, CZ-61137 Brno, Czech Republic

<sup>4</sup> Université de Namur, Unit of Nanomaterial Chemistry, Department of Chemistry, Namur 5000, Belgium

\*Corresponding author: [damien.debecker@uclouvain.be](mailto:damien.debecker@uclouvain.be)

## Supplementary information

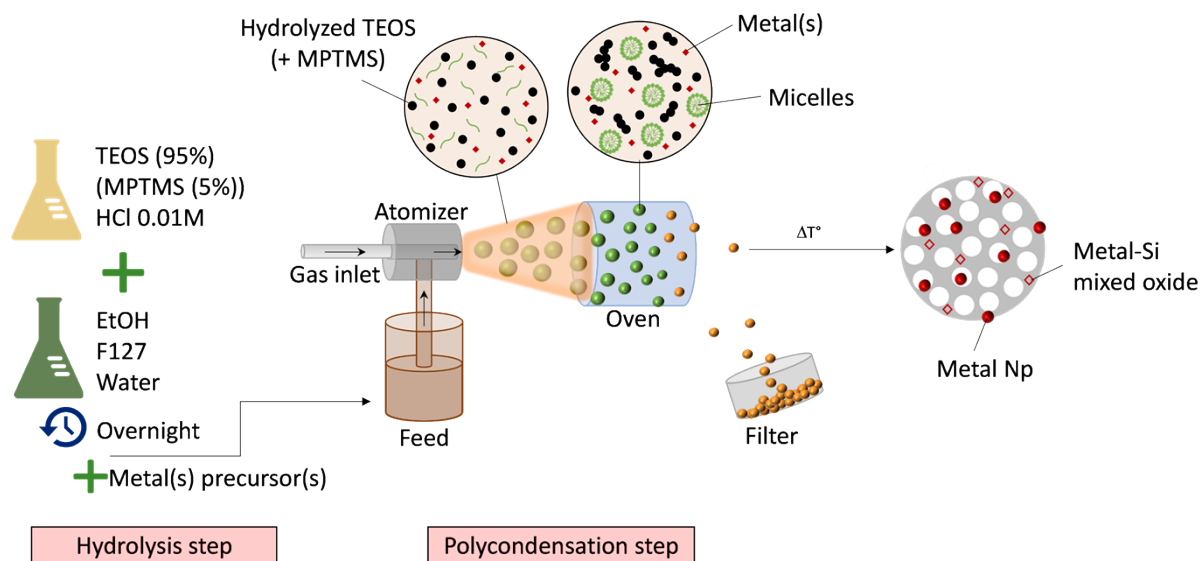

**Scheme S1:** Schematic view of the aerosol-assisted sol-gel process

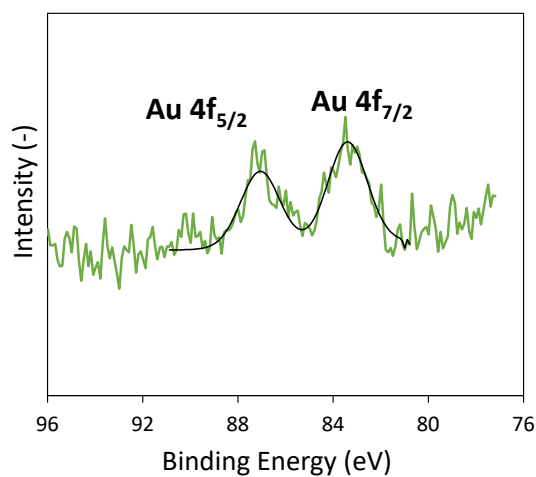

**Figure S1:** XPS spectra of the Au4f region of AuSiO<sub>2</sub>. The theoretical binding energy of Au4f<sub>7/2</sub><sup>0</sup> is 84.3 eV.

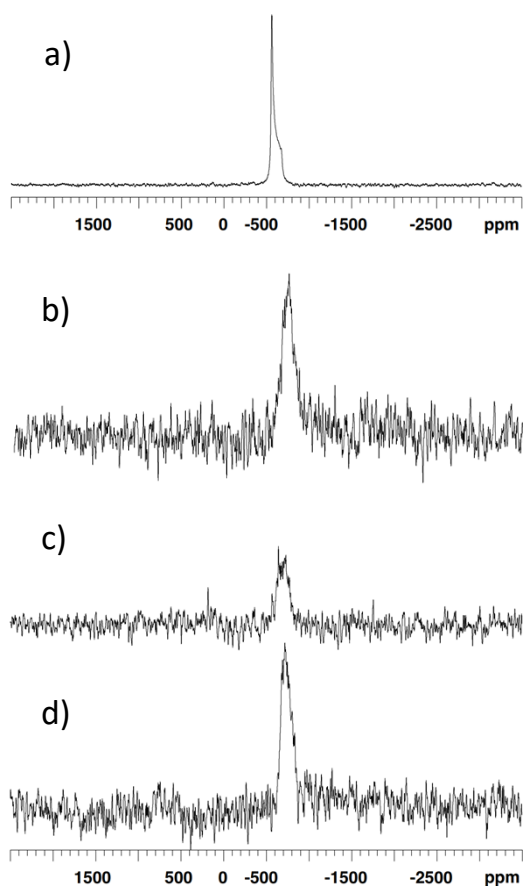

**Figure S2:** Solid state  $^{119}\text{Sn}$  static NMR spectrum of (a) pure  $\text{SnO}_2$ , (b)  $\text{Au}(1)\text{SnSiO}_2$  calcined, (c) fresh  $\text{Au}(1)\text{SnSiO}_2$  and (d)  $\text{SnSiO}_2$  calcined.

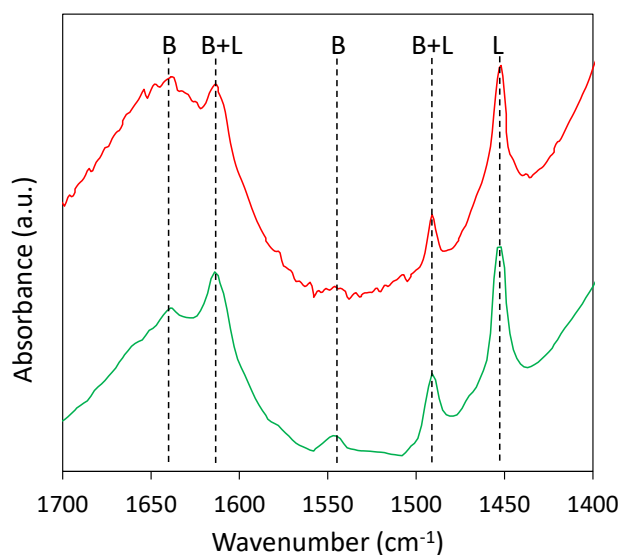

**Figure S3:** FTIR spectra after pyridine adsorption and desorption at  $150\text{ }^\circ\text{C}$  for 2 hours of  $\text{SnSiO}_2$  (bottom green curve) and  $\text{Au}(1)\text{SnSiO}_2$  (top red curve). B = band corresponding to Bronsted acid sites; L = band corresponding to Lewis acid sites.

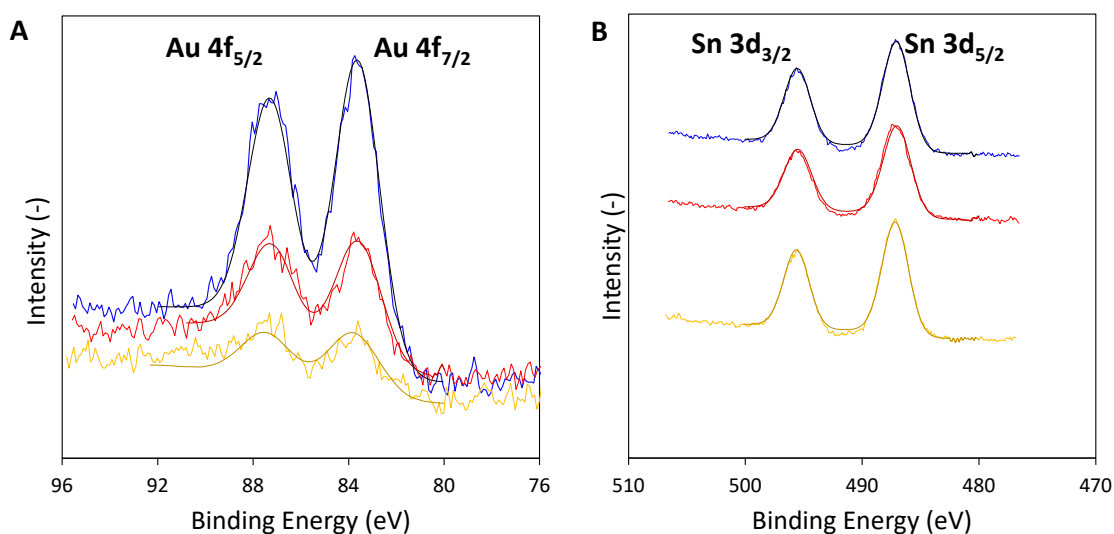

**Figure S4:** XPS spectra of the (A) the Au4f region and (B) Sn3d region of Au(x)SnSiO<sub>2</sub> (x = 0.5% (-), 1% (-), or 2% (-)). The theoretical binding energy of Au4f<sub>7/2</sub><sup>0</sup> and Sn3d<sub>5/2</sub> in Sn<sup>4+</sup> state are respectively 84.3 eV and 487.2 eV.

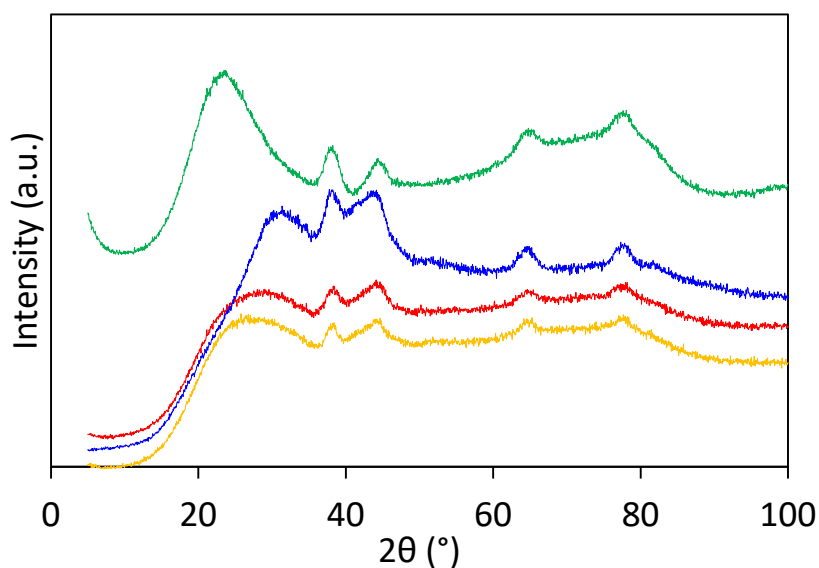

**Figure S5:** Comparison of the XRD diffractograms obtained with the monofunctional AuSiO<sub>2</sub> catalysts and the bifunctional Au(x)SnSiO<sub>2</sub> catalysts (x = 0.5% (-), 1% (-), or 2% (-)). The presence of the small shoulder at ~41° in the bifunctional catalyst is noticed but can not be interpreted at this stage.

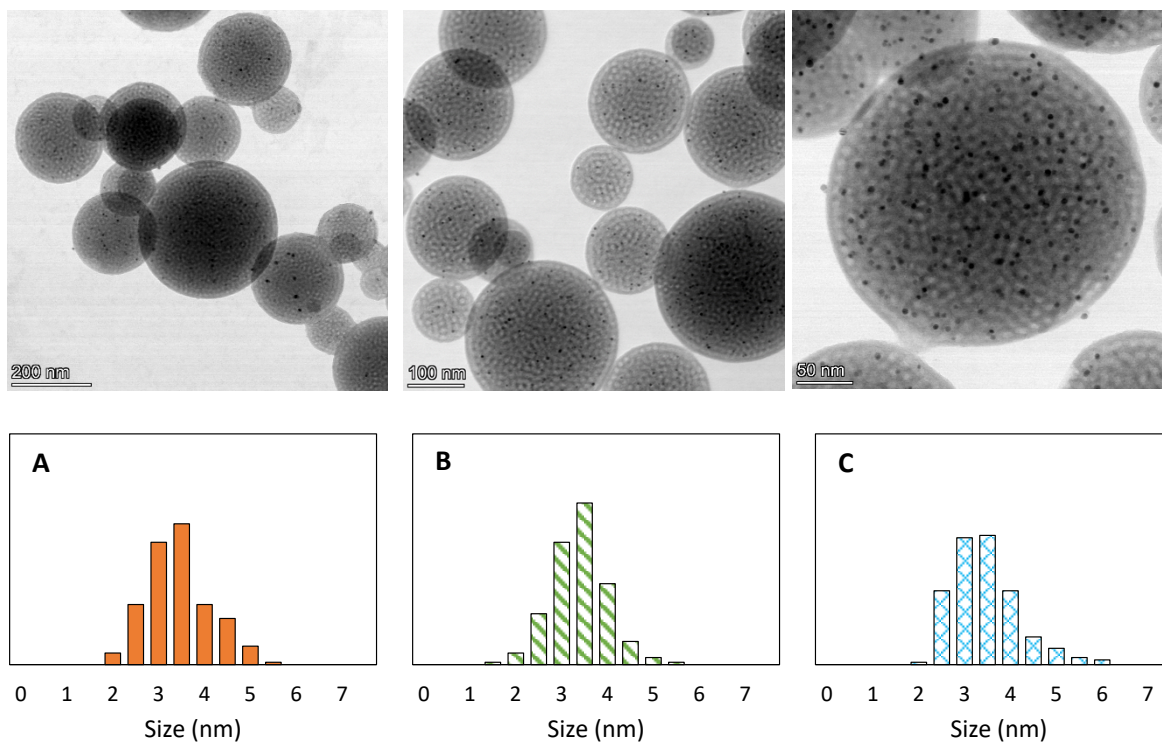

**Figure S6:** Gold nanoparticles size distribution of (A) Au(0.5)SnSiO<sub>2</sub>, (B) Au(1)SnSiO<sub>2</sub> and (C) Au(2)SnSiO<sub>2</sub>. TEM micrographs are shown as representative images of the samples used to count and measure nanoparticles size; the size distribution was estimated by measuring ~200 nanoparticles.

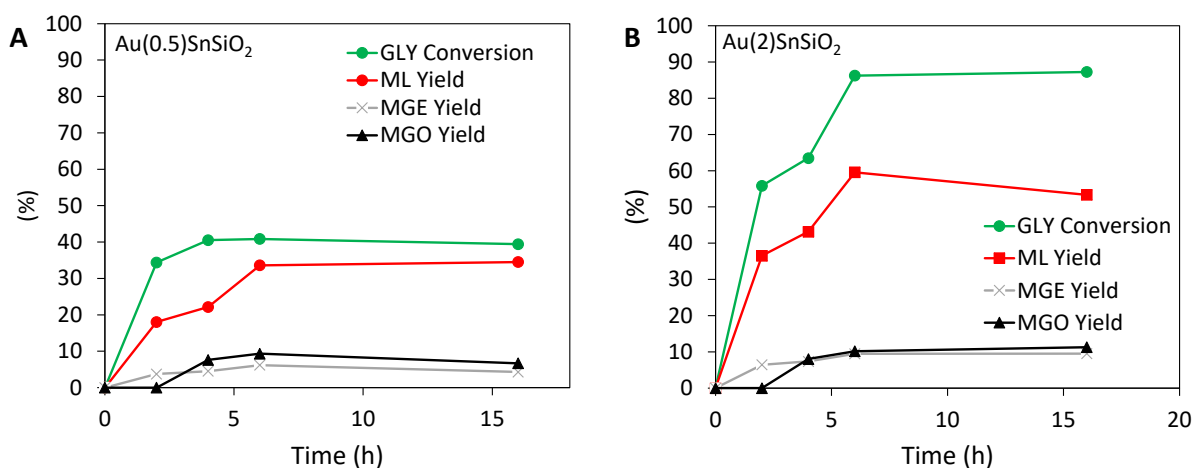

**Figure S7:** Kinetic study of the transformation glycerol (GLY) to methyl lactate (ML), methyl glycerate (MGE) and methyl glycolate (MGO) with (A) Au(0.5)SnSiO<sub>2</sub> and (B) Au(2)SnSiO<sub>2</sub>. Reaction conditions: T = 160°C, pair = 15 bars, 0.125 M glycerol in methanol, and GLY/Catalyst ratio = 1.15 (w/w). Each measure has an error of ± 5%.

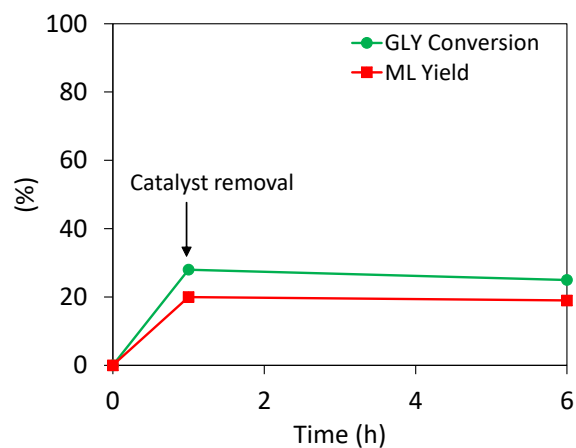

**Figure S8:** Hot filtration test performed with Au(1)SnSiO<sub>2</sub>.

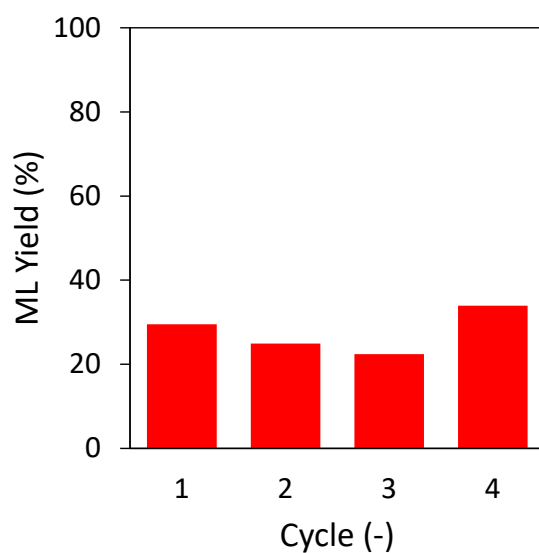

**Figure S9:** Recycling test performed with Au(1)SnSiO<sub>2</sub>. The Au/GLY ratio was maintained constant in each cycle.

**Table S1:** Catalytic performance of Au(1)SnSiO<sub>2</sub> on different reaction conditions.

| Temperature (°C) | P <sub>air</sub> (bars) | Gly/Au (w/w) | GLY conversion (%) | ML Selectivity (%) | ML Yield (%) |
|------------------|-------------------------|--------------|--------------------|--------------------|--------------|
| 160              | 15                      | 1.15         | 85                 | 73.1               | 62.2         |
| 160              | <b>30</b>               | 1.15         | 77.5               | 72.9               | 56.5         |
| 160              | 30                      | <b>0.575</b> | 69.5               | 75.2               | 52.2         |
| 160              | 30                      | <b>2.3</b>   | 77.2               | 67.6               | 52.2         |
| 160              | 30                      | <b>4.6</b>   | 54                 | 54.3               | 29.3         |

|            |    |     |      |      |      |
|------------|----|-----|------|------|------|
| <b>120</b> | 30 | 2.3 | 5    | 100  | 5    |
| <b>140</b> | 30 | 2.3 | 41.2 | 66.9 | 27.7 |
| <b>180</b> | 30 | 2.3 | 96.4 | 60   | 57.8 |

One parameter is change at the time. Increasing the amount of air (and therefore the amount of oxidant in the reactor) did not improve the catalytic performance of Au(1)SnSiO<sub>2</sub>. Similarly, increasing the amount of glycerol does not have a significant impact to a certain point (GLY/Au (w/w) = 4.6) where the ML yield starts to decrease. The diminution of temperature leads to the gradual loss of activity, while increasing the temperature reduced the selectivity to ML.

## References

- 1 R. K. Pazhavelikkakath Purushothaman, J. van Haveren, I. Melián-Cabrera, E. R. H. van Eck and H. J. Heeres, *ChemSusChem*, 2014, **7**, 1140–1147.
- 2 J. Li, D. Li, C. Liu, C. Xu and W. Dong, *Journal of Chemical Technology & Biotechnology*, 2019, **94**, 1958–1967.
- 3 L. Zhou, Y. Xu, X. Yang, T. Lu and L. Han, *Energy Conversion and Management*, 2019, **196**, 277–285.
- 4 B. Tang, D. Wang, A. Li, H.-M. Tang, E.-C. Yang and W. Dai, *Microporous and Mesoporous Materials*, 2023, **347**, 112348.
